# Supplementary material
Source: publisher site journal article supplement (https://www.spandidos-publications.com/3850/downloadSupplementary)
Supplement: Supplementary file 1 [file downloadSupplementary]

## Sheet: Sheet1
Table SII: The full list of GO terms for significantly expressed miRNAs.
A, Biological process
	GO ID	GO term Name	P-value	Target gene count
1	GO:0000278	Mitotic cell cycle	<1x10-325	146
2	GO:0006461	Protein complex assembly	<1x10-325	239
3	GO:0006464	Cellular protein modification process	<1x10-325	744
4	GO:0006950	Response to stress	<1x10-325	625
5	GO:0007596	Blood coagulation	<1x10-325	150
6	GO:0008150	Biological_process	<1x10-325	3807
7	GO:0008219	Cell death	<1x10-325	305
8	GO:0009056	Catabolic process	<1x10-325	605
9	GO:0009058	Biosynthetic process	<1x10-325	1079
10	GO:0010467	Gene expression	<1x10-325	286
11	GO:0016032	Viral process	<1x10-325	226
12	GO:0016070	RNA metabolic process	<1x10-325	97
13	GO:0016071	mRNA metabolic process	<1x10-325	89
14	GO:0022607	Cellular component assembly	<1x10-325	411
15	GO:0034166	Toll-like receptor 10 signaling pathway	<1x10-325	37
16	GO:0034641	Cellular nitrogen compound metabolic process	<1x10-325	1337
17	GO:0034655	Nucleobase-containing compound catabolic process	<1x10-325	302
18	GO:0038095	Fc-epsilon receptor signaling pathway	<1x10-325	62
19	GO:0038123	Toll-like receptor TLR1:TLR2 signaling pathway	<1x10-325	38
20	GO:0038124	Toll-like receptor TLR6:TLR2 signaling pathway	<1x10-325	38
21	GO:0043687	Post-translational protein modification	<1x10-325	69
22	GO:0044267	Cellular protein metabolic process	<1x10-325	199
23	GO:0044281	Small molecule metabolic process	<1x10-325	700
24	GO:0044403	Symbiosis, encompassing mutualism through parasitism	<1x10-325	247
25	GO:0048011	Neurotrophin TRK receptor signaling pathway	<1x10-325	99
26	GO:0061024	Membrane organization	<1x10-325	212
27	GO:0065003	Macromolecular complex assembly	<1x10-325	300
28	GO:0002376	Immune system process	1.11x10-16	399
29	GO:0035666	TRIF-dependent toll-like receptor signaling pathway	8.88x10-16	37
30	GO:0034146	Toll-like receptor 5 signaling pathway	2.00x10-15	37
31	GO:0002756	MyD88-independent toll-like receptor signaling pathway	1.47x10-14	38
32	GO:0007173	Epidermal growth factor receptor signaling pathway	2.36x10-14	73
33	GO:0034162	Toll-like receptor 9 signaling pathway	2.74x10-14	38
34	GO:0006921	Cellular component disassembly involved in execution phase of apoptosis	9.00x10-14	23
35	GO:0006259	DNA metabolic process	3.34x10-13	200
36	GO:0034138	Toll-like receptor 3 signaling pathway	2.29x10-12	38
37	GO:0051403	Stress-activated MAPK cascade	3.41x10-12	30
38	GO:0034134	Toll-like receptor 2 signaling pathway	3.82x10-12	38
39	GO:0038096	Fc-gamma receptor signaling pathway involved in phagocytosis	3.82x10-12	32
40	GO:0006325	Chromatin organization	4.00x10-12	56
41	GO:0000086	G2/M transition of mitotic cell cycle	7.40x10-12	53
42	GO:0002224	Toll-like receptor signaling pathway	9.61x10-12	49
43	GO:0034330	Cell junction organization	9.44x10-11	56
44	GO:0045087	Innate immune response	2.63x10-10	183
45	GO:0032481	Positive regulation of type I interferon production	9.48x10-10	31
46	GO:0006913	Nucleocytoplasmic transport	1.18x10-09	112
47	GO:0007010	Cytoskeleton organization	1.23x10-09	177
48	GO:0007179	Transforming growth factor beta receptor signaling pathway	1.61x10-09	69
49	GO:0007050	Cell cycle arrest	3.60x10-09	61
50	GO:0048015	Phosphatidylinositol-mediated signaling	6.95x10-07	41
51	GO:0007411	Axon guidance	2.06x10-06	118
52	GO:0008286	Insulin receptor signaling pathway	1.06x10-05	48
53	GO:0050900	Leukocyte migration	0.11x10-3	40
B, Cellular component
1	GO:0005575	Cellular_component	<1x10-325	3927
2	GO:0005654	Nucleoplasm	<1x10-325	422
3	GO:0005829	Cytosol	<1x10-325	880
4	GO:0043226	Organelle	<1x10-325	2831
5	GO:0043234	Protein complex	<1x10-325	1092
6	GO:0005815	Microtubule organizing center	3.36x10-14	140
C, Molecular function
1	GO:0000988	Protein binding transcription factor activity	<1x10-325	165
2	GO:0001071	Nucleic acid binding transcription factor activity	<1x10-325	240
3	GO:0003674	Molecular_function	<1x10-325	3916
4	GO:0003723	RNA binding	<1x10-325	641
5	GO:0008092	Cytoskeletal protein binding	<1x10-325	244
6	GO:0019899	Enzyme binding	<1x10-325	475
7	GO:0030234	Enzyme regulator activity	<1x10-325	242
8	GO:0043167	Ion binding	<1x10-325	1563
9	GO:0044822	Poly(A) RNA binding	<1x10-325	532
10	GO:0032182	Small conjugating protein binding	1.62x10-09	40
